# Supplementary material
Source: PubMed Central journal article supplement (PMC3872765)
Supplement: tjp0591-5977-SD1.pdf [file tjp0591-5977-SD1.pdf]

## Supplementary fig 1

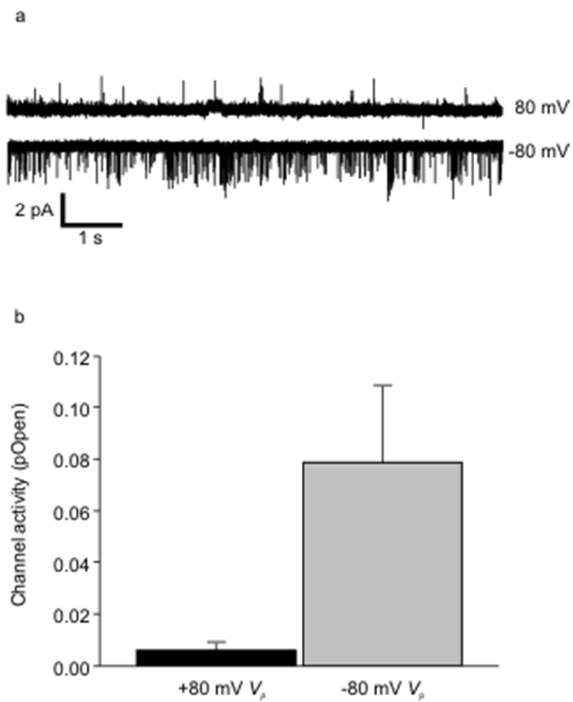

### Figure S1. Voltage sensitive channel activity

**a** Single channel recording demonstrating voltage activation of a channel at negative pipette potentials (positive membrane potential) in a *Task1*<sup>-/-</sup> type 1 cell which was devoid of TASK3-like channel activity. Cells were superfused with 100 mM K<sup>+</sup>, nominally Ca<sup>2+</sup> free Tyrode solution. Recording conditions were as detailed for other experiments. **b** Comparison of channel activity at positive and negative pipette potentials in cell-attached patches.  $n = 5$  patches from *Task1*<sup>-/-</sup> cells.
